# Supplementary material for: Prostaglandin E2 alleviates acetaminophen-induced liver injury through DDIT4-enhanced autophagy regulated by circLima1/miR- 486
Source: Research Square preprint supplement (doi:10.21203/rs.3.rs-8110558/v1), 2025-12-04
Supplement: Supplementary file 1 [file 297f54455efbcd583ca684e0.docx]

**Table S5 Overview of miRNA sequencing data**

| Sample | Reads | Bases | Error rate | Q20 | Q30 | GC content |
| --- | --- | --- | --- | --- | --- | --- |
| CON-1 | 11592809 | 0.580G | 0.01% | 98.94% | 96.74% | 49.36% |
| CON-2 | 13264445 | 0.663G | 0.01% | 99.27% | 97.34% | 49.26% |
| CON-3 | 15759700 | 0.788G | 0.01% | 99.44% | 97.88% | 49.51% |
| APAP-1 | 12156322 | 0.608G | 0.01% | 99.48% | 97.96% | 49.72% |
| APAP-2 | 11632365 | 0.582G | 0.01% | 99.44% | 97.81% | 49.06% |
| APAP-3 | 10879097 | 0.544G | 0.01% | 99.44% | 97.91% | 51.60% |
| PGE2-1 | 14242853 | 0.712G | 0.01% | 99.47% | 97.99% | 50.68% |
| PGE2-2 | 11176996 | 0.559G | 0.01% | 99.49% | 98.01% | 52.96% |
| PGE2-3 | 13907511 | 0.695G | 0.01% | 99.28% | 97.31% | 51.27% |
