# Supplementary material for: Prostaglandin E2 alleviates acetaminophen-induced liver injury through DDIT4-enhanced autophagy regulated by circLima1/miR- 486
Source: Research Square preprint supplement (doi:10.21203/rs.3.rs-8110558/v1), 2025-12-04
Supplement: Supplementary file 3 [file 6843a1864368fb40d0391a32.docx]

| Sample  name | Raw  reads | Clean  reads | Raw  bases(G) | Clean  bases(G) | Error  rate (%) | Q20  (%) | Q30  (%) | GC  Content (%) |
| --- | --- | --- | --- | --- | --- | --- | --- | --- |
| CON-1 | 57463152 | 56402446 | 8.62 | 8.46 | 0.02 | 98 | 94.39 | 59.27 |
| CON-2 | 51133756 | 50442800 | 7.67 | 7.57 | 0.03 | 97.84 | 94.1 | 59.43 |
| CON-3 | 71288148 | 70234850 | 10.69 | 10.54 | 0.02 | 98.06 | 94.25 | 50.99 |
| APAP-1 | 52239888 | 51136200 | 7.84 | 7.67 | 0.03 | 97.91 | 94.14 | 58.22 |
| APAP-2 | 51722082 | 50501094 | 7.76 | 7.58 | 0.03 | 97.7 | 93.75 | 59.1 |
| APAP-3 | 53361388 | 52342344 | 8 | 7.85 | 0.02 | 98.03 | 94.52 | 58.45 |
| PGE2-1 | 50875532 | 49719766 | 7.63 | 7.46 | 0.03 | 97.84 | 94.08 | 57.82 |
| PGE2-2 | 50934030 | 50133452 | 7.64 | 7.52 | 0.03 | 97.73 | 93.79 | 58.76 |
| PGE2-3 | 53277748 | 52241380 | 7.99 | 7.84 | 0.03 | 97.89 | 94.15 | 58.69 |

**Table S4 Overview of circRNA sequencing data**
