# Supplementary material for: Prostaglandin E2 alleviates acetaminophen-induced liver injury through DDIT4-enhanced autophagy regulated by circLima1/miR- 486
Source: Research Square preprint supplement (doi:10.21203/rs.3.rs-8110558/v1), 2025-12-04
Supplement: Supplementary file 4 [file b38d750054d00f0008426665.docx]

**Table S9 siRNA and miRNA mimics**

| **Gene** | type | sequence（5-3） | sequence（5-3） |
| --- | --- | --- | --- |
| mmu-miR-486a | mimics | CGGGGCAGCUCAGUACAGGAU | CCUGUACUGAGCUGCCCCGUU |
| mmu-miR-486b | mimics | CGGGGCAGCUCAGUACAGGA | CUGUACUGAGCUGCCCCGUU |
| REDD1-siRNA | siRNA | UGAUGCCUAGCCAGUUGGUAA | UUACCAACUGGCUAGGCAUCA |
| CircLima1 | siRNA | AACCAAACCAAGAACCCUGTT | CAGGGUUCUUGGUUUGGUUTT |
| CircSlc25a15 | siRNA | CAGUCAGAAGGAUAUGUGGUATT | UACCACAUAUCCUUCUGACUGTT |
