# Supplementary material for: Prostaglandin E2 alleviates acetaminophen-induced liver injury through DDIT4-enhanced autophagy regulated by circLima1/miR- 486
Source: Research Square preprint supplement (doi:10.21203/rs.3.rs-8110558/v1), 2025-12-04
Supplement: Supplementary file 5 [file c7052881ebad0f9b58418ffa.docx]

**Table S7 Primer List**

| **Gene** |  | Sequence（5-3） |
| --- | --- | --- |
| mmu-DDIT4-F | Forward | CAAGGCAAGAGCTGCCATAG |
| mmu-DDIT4-R | Reverse | CCGGTACTTAGCGTCAGGG |
| mmu-miR-486a-RT | RT | GTCGTATCCAGTGCAGGGTCCGAGGTATTCGCACTGGATACGACATCCTG |
| mmu-miR-486a-Stemloop-F | Forward | CGCGGGGCAGCTCAGTA |
| mmu-miR-486a-Stemloop-R | Reverse | AGTGCAGGGTCCGAGGTATT |
| mmu-miR-486b-RT | RT | GTCGTATCCAGTGCAGGGTCCGAGGTATTCGCACTGGATACGACTCCTGT |
| mmu-miR-486b-Stemloop-F | Forward | CGCGGGGCAGCTCAGT |
| mmu-miR-486b-Stemloop-R | Reverse | AGTGCAGGGTCCGAGGTATT |
| mmu-U6-Stemloop-F | Forward | CTCGCTTCGGCAGCACA |
| mmu-U6-Stemloop-R | RT/Reverse | AACGCTTCACGAATTTGCGT |
| CircLima1-F | Forward | CACAACCAAACCAAGAACCCTG |
| CircLima1-R | Reverse | ACCGGGTTCTCCCACTTCTT |
| CircSlc25a15-F | Forward | CACGGAGCTTGTGAAATGCC |
| CircSlc25a15-R | Reverse | ACATATCCTTCTGACTGGCCG |
| hsa-DDIT4-F | Forward | TGAGGATGAACACTTGTGTGC |
| hsa-DDIT4-R | Reverse | CCAACTGGCTAGGCATCAGC |
