# Supplementary material for: Prostaglandin E2 alleviates acetaminophen-induced liver injury through DDIT4-enhanced autophagy regulated by circLima1/miR- 486
Source: Research Square preprint supplement (doi:10.21203/rs.3.rs-8110558/v1), 2025-12-04
Supplement: Supplementary file 6 [file c7bbf17342467440cc124bc3.docx]

Table S12 Statistics of small RNA reads mapped to genome

| Sample | Total sRNA | Mapped sRNA(+) | Mapped sRNA(-) | Mapped sRNA |
| --- | --- | --- | --- | --- |
| CON-1 | 9513591 (100.00%) | 9085467 (95.50%) | 5022132 (52.79%) | 4063335 (42.71%) |
| CON-2 | 10538972 (100.00%) | 9999549 (94.88%) | 6352229 (60.27%) | 3647320 (34.61%) |
| CON-3 | 13498498 (100.00%) | 12761070 (94.54%) | 7536043 (55.83%) | 5225027 (38.71%) |
| APAP-1 | 9025922 (100.00%) | 8423777 (93.33%) | 5219616 (57.83%) | 3204161 (35.50%) |
| APAP-2 | 9305674 (100.00%) | 8832836 (94.92%) | 5192804 (55.80%) | 3640032 (39.12%) |
| APAP-3 | 4797471 (100.00%) | 4418747 (92.11%) | 2748202 (57.28%) | 1670545 (34.82%) |
| PGE2-1 | 10337383 (100.00%) | 9433531 (91.26%) | 6056052 (58.58%) | 3377479 (32.67%) |
| PGE2-2 | 1827373 (100.00%) | 1637646 (89.62%) | 1059750 (57.99%) | 577896 (31.62%) |
| PGE2-3 | 7190816 (100.00%) | 6684267 (92.96%) | 4075518 (56.68%) | 2608749 (36.28%) |
