# Supplementary material for: Prostaglandin E2 alleviates acetaminophen-induced liver injury through DDIT4-enhanced autophagy regulated by circLima1/miR- 486
Source: Research Square preprint supplement (doi:10.21203/rs.3.rs-8110558/v1), 2025-12-04
Supplement: Supplementary file 7 [file f357c7e0a6ceb4a65a35270b.docx]

| Sample  name | Raw  reads | Clean  reads | Raw  bases(G) | Clean  bases(G) | Error  rate (%) | Q20  (%) | Q30  (%) | GC  Content (%) |
| --- | --- | --- | --- | --- | --- | --- | --- | --- |
| CON-1 | 87744314 | 86877126 | 13.16 | 13.03 | 0.03 | 97.86 | 93.77 | 50.43 |
| CON-2 | 90939048 | 90067760 | 13.64 | 13.51 | 0.03 | 97.82 | 93.67 | 50.21 |
| CON-3 | 89680224 | 88352080 | 13.45 | 13.25 | 0.03 | 98.05 | 94.19 | 51.01 |
| APAP_1 | 82290944 | 81046342 | 12.34 | 12.16 | 0.02 | 98.22 | 94.94 | 50.83 |
| APAP_2 | 84774524 | 83660800 | 12.72 | 12.55 | 0.02 | 98.06 | 94.59 | 50.97 |
| APAP_3 | 1.02E+08 | 1.01E+08 | 15.37 | 15.14 | 0.02 | 98.15 | 94.83 | 50.53 |
| PGE2-1 | 1.07E+08 | 1.05E+08 | 16.01 | 15.76 | 0.02 | 98.27 | 95.02 | 50.57 |
| PGE2-2 | 93910760 | 92450104 | 14.09 | 13.87 | 0.02 | 98.15 | 94.71 | 50.47 |
| PGE2-3 | 90493616 | 89193528 | 13.57 | 13.38 | 0.02 | 98.1 | 94.67 | 50.44 |

**Table S6 Overview of mRNA sequencing data**
